# Supplementary material
Source: Springer Nature journal article supplement (https://www.springermedizin.de/resource/supplementary/12889_2013_6420_MOESM5_ESM.pdf/9497896)

# Home-based vs. facility-based care trials for HIV suppression from Africa

Funnel plot with pseudo 95% confidence limits

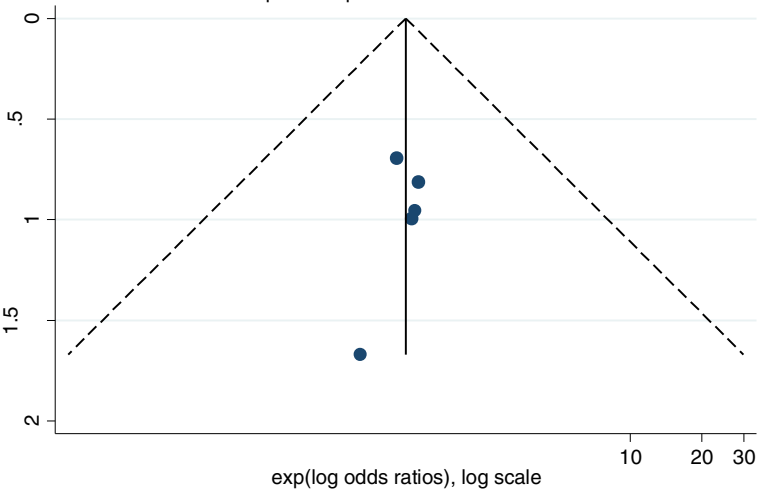

Supplement: MOESM5 [file 9497896]
